# Supplementary material
Source: publisher figshare collection journal article supplement (https://karger.figshare.com/ndownloader/files/8706283)

## Supplemental Figure

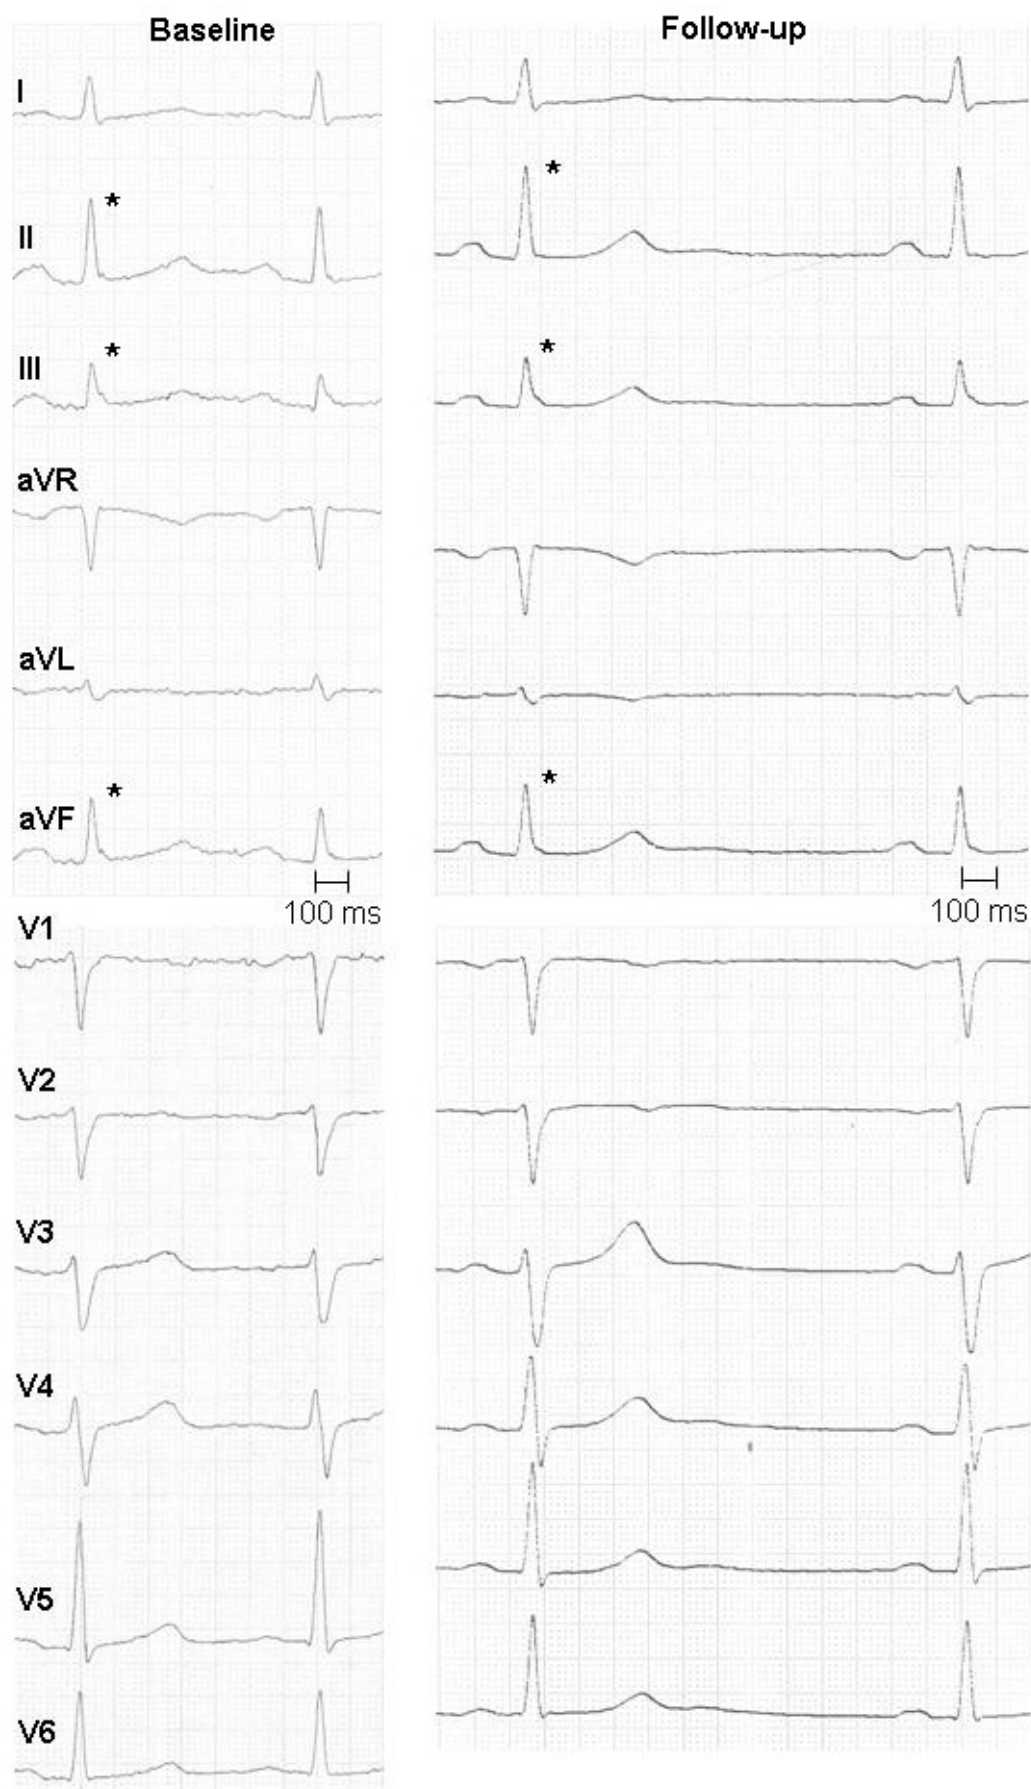

Supplement: Supplementary file 1 [file 8706283]
